# Supplementary material for: In vivo fate of free and encapsulated iron oxide nanoparticles after injection of labelled stem cells
Source: Nanoscale Adv. 2018 Sep 25;1(1):367–77. doi: 10.1039/c8na00098k (PMC9473218; doi:10.1039/c8na00098k)
Supplement: NA-001-C8NA00098K-s001 [file NA-001-C8NA00098K-s001.pdf]

***In vivo* fate of free and encapsulated iron oxide nanoparticles after injection of labelled stem cells**

Sumaira Ashraf<sup>1\*</sup>, Arthur Taylor<sup>2,3</sup>, Jack Sharkey<sup>2,3</sup>, Michael Barrow<sup>4</sup>, Patricia Murray<sup>2,3</sup>, Bettina Wilm<sup>2,3</sup>, Harish Poptani<sup>2,3</sup>, Matthew J. Rosseinsky<sup>4</sup>, Dave J. Adams<sup>4,5</sup>, Raphaël Lévy<sup>1\*</sup>

<sup>1</sup>Department of Biochemistry, Institute of Integrative Biology (IIB), University of Liverpool, Liverpool, United Kingdom

<sup>2</sup>Department of Cellular and Molecular Physiology, Institute of Translational medicine (ITM), University of Liverpool, Liverpool, United Kingdom

<sup>3</sup>Centre for Preclinical Imaging, Institute of Translational medicine (ITM), University of Liverpool, Liverpool, United Kingdom

<sup>4</sup>Department of Chemistry, University of Liverpool, Liverpool, United Kingdom

<sup>5</sup>School of Chemistry, University of Glasgow, Glasgow, United Kingdom

**\*Corresponding authors:** [rapha@liverpool.ac.uk](mailto:rapha@liverpool.ac.uk), [sumaira@liverpool.ac.uk](mailto:sumaira@liverpool.ac.uk)

**Supplementary Information**

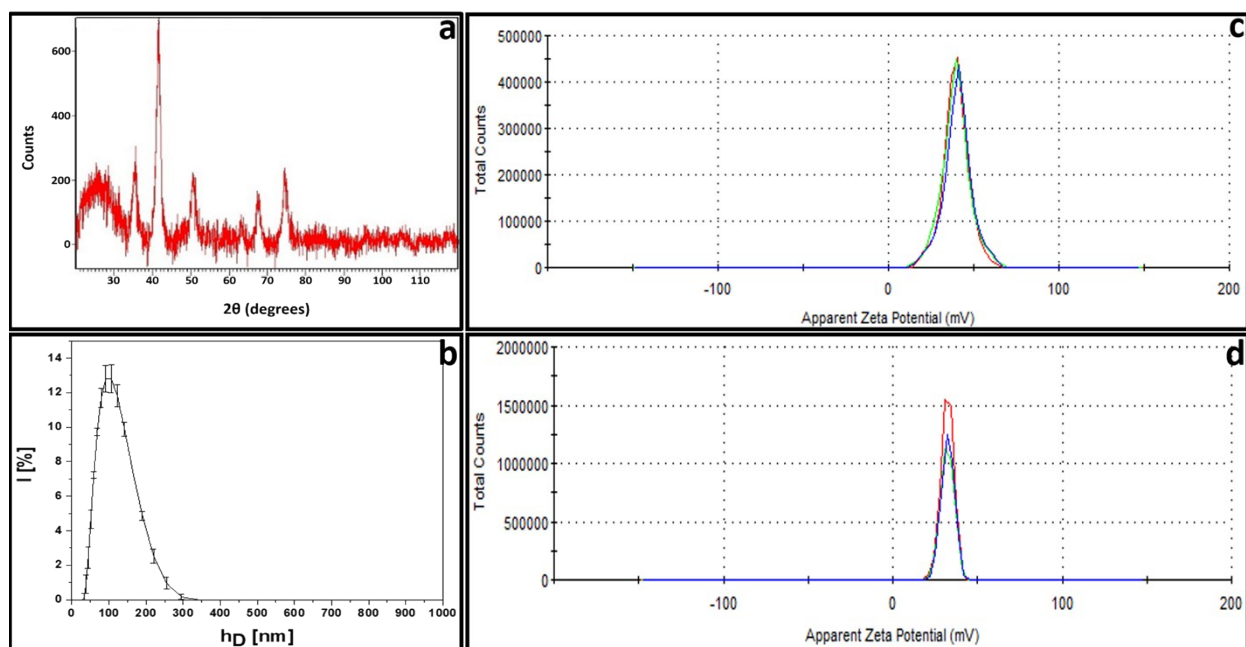

**Figure SI.1:** Characterization of free and encapsulated SPIONs by means of powder X-ray diffraction (pXRD), dynamic light scattering and zeta potential (ZP). pXRD of free SPIONS (a), hydrodynamic diameter (% intensity) of free SPIONS in water (b), and zeta potential measurements of free (39.5 mV) and encapsulated SPIONS (32.1 mV) in water is presented in (c) and (d), respectively. Three repeat measurements are shown for (c) and (d). The ZP measurements for large sedimenting objects (encapsulated SPIONS; d) is not reliable as sedimentation during the measurement period affects the accuracy of the data.

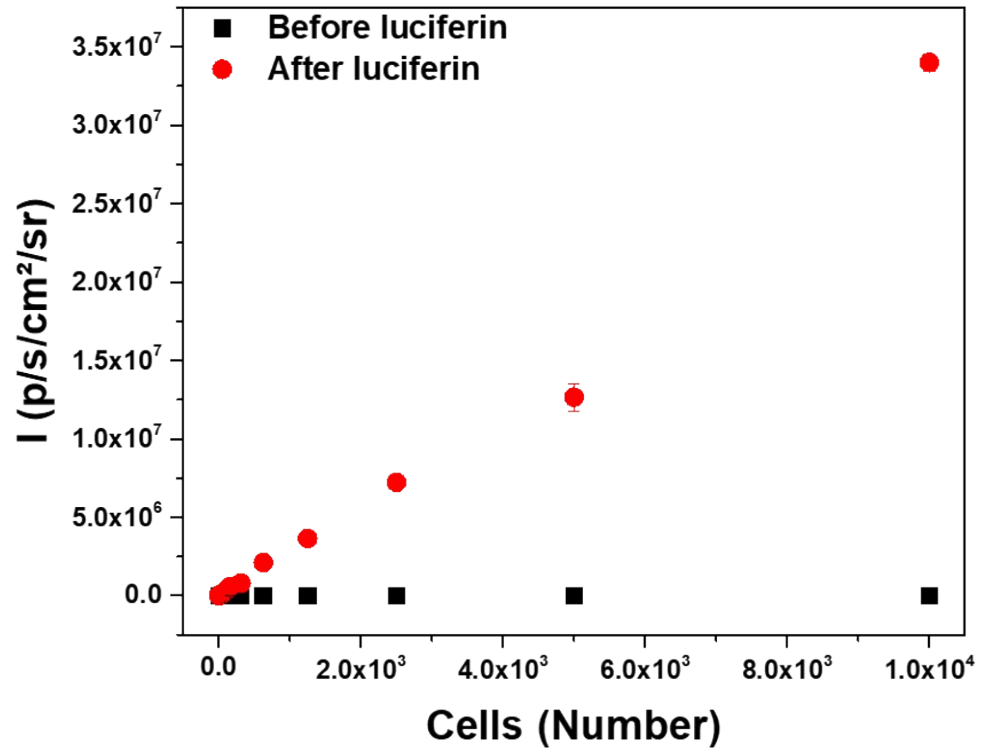

**Figure SI.2:** *In vitro* bioluminescence of mMSCs before and after the addition of D-luciferin.

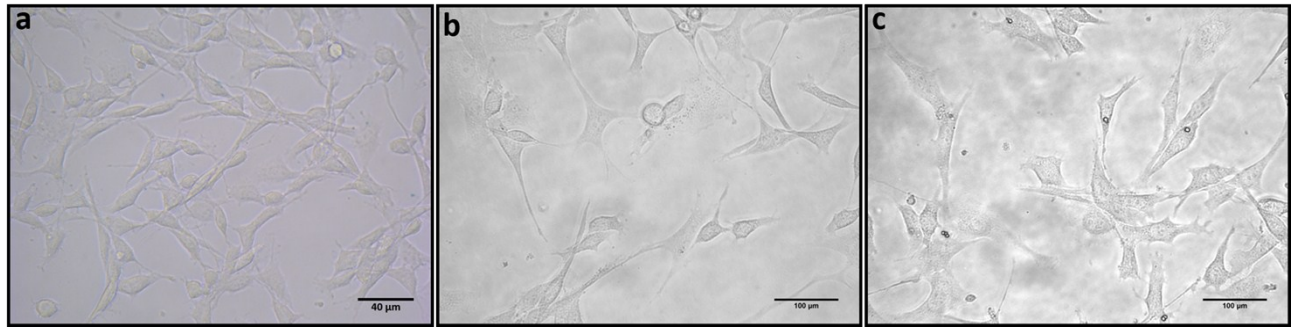

**Figure SI.3:** Morphology of mMSCs after labelling with particles. Unlabelled cells (a), cells labelled with free (b) and encapsulated SPIONs (c). After trypsinization the particle labelled cells were kept in ice cold PBS for 5 - 6 hrs and re-seeded. Cells were observed 3 days post seeding using 40 and 20 x objectives for unlabelled and particle-labelled cells, respectively.

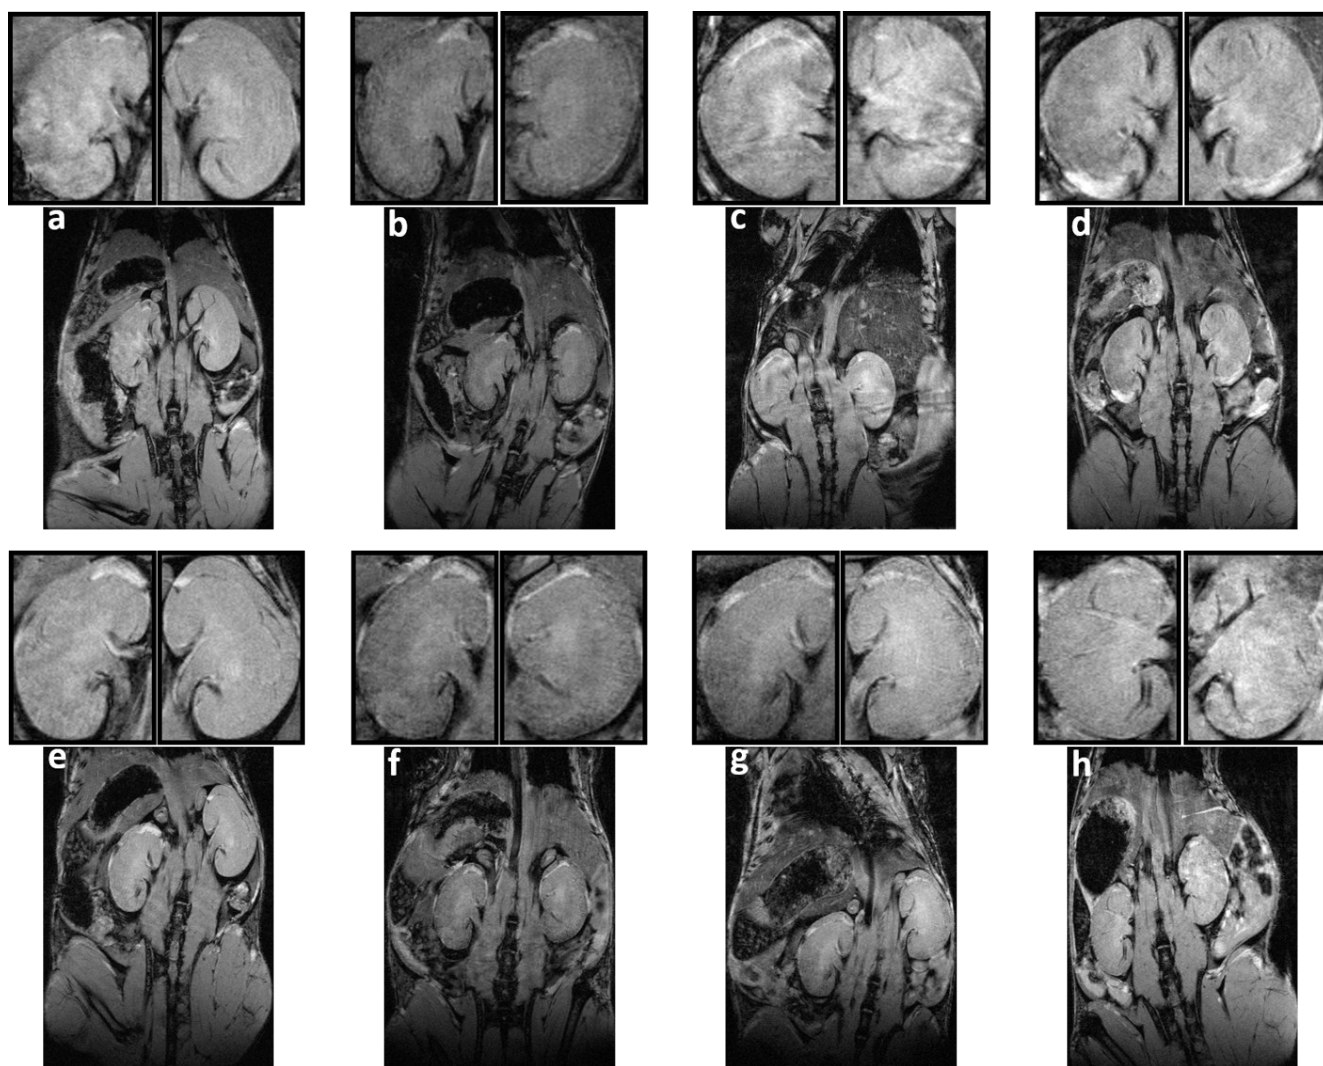

**Figure SI.4:** MR images of mice organs at selective days are presented. For clarity one mouse representing each treatment group (free SPIONs; a-d, and encapsulated SPIONs; e-h) are presented with zoomed in kidneys above each mouse (to see the contrast of SPIONs in kidney cortices) are shown. Mice abdominal MR scans before injection (baseline; a, e), day 0 (injection day; b, f), day 1 (post injection; c, g) and day 14 (post injection; d, h) are presented. Detailed abdominal scans of all mice at each imaging/scanning day can be found from <https://doi.org/10.5281/zenodo.1203991>.

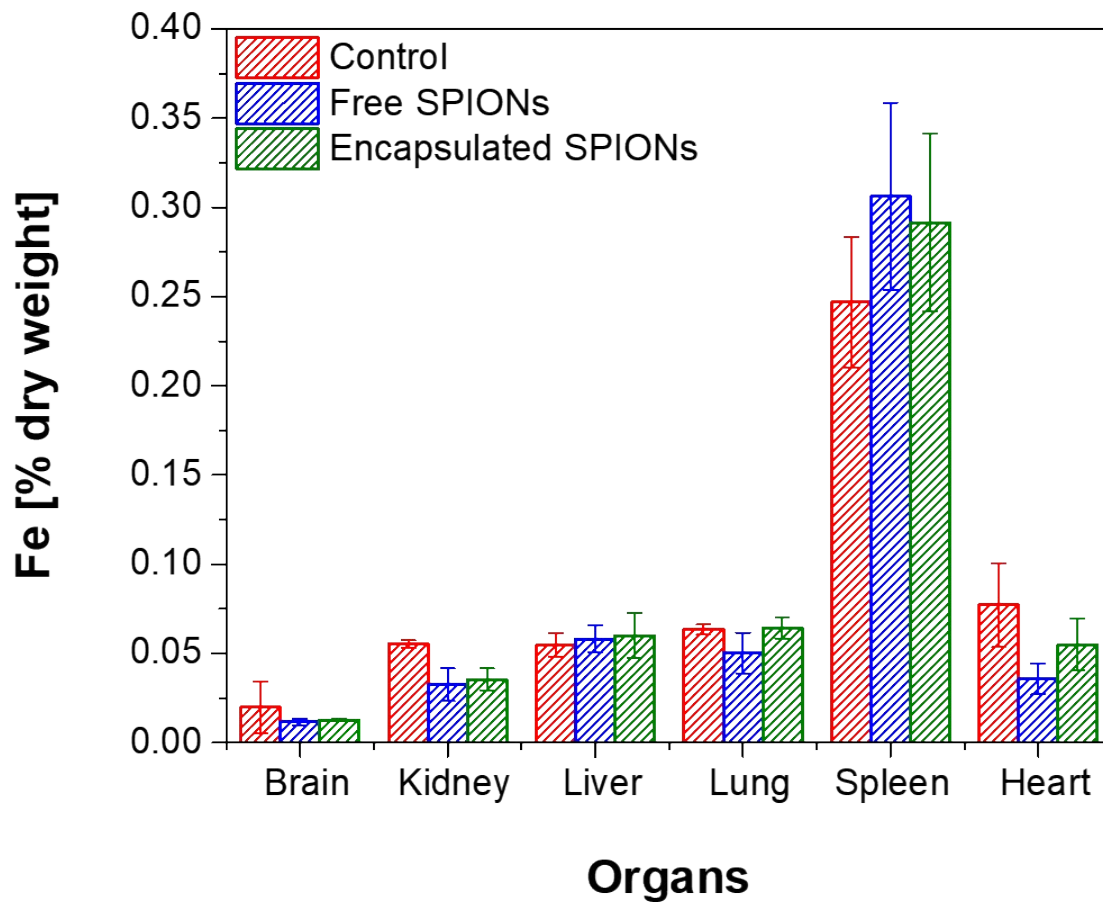

**Figure SI.5:** ICP-OES based Fe (iron) quantification of dried organs, collected at the end of experiments (day 14 post injection). Control group of mice did not receive any injection.

| Sequence                          | FLASH T2*                     | B0 Map                         | MGE<br>T2* Map                 |
|-----------------------------------|-------------------------------|--------------------------------|--------------------------------|
| Purpose                           | T2* imaging                   | T2* Map<br>Shimming            | T2* relaxation                 |
| Echo time (ms)                    | 4.9                           | 1.59                           | 4.5                            |
| Repetition time (ms)              | 253                           | 10                             | 800                            |
| Flip angle                        | 20                            | 15                             | 50                             |
| Matrix size (pixels)              | 326 x 326                     | 64 x 64                        | 256 x 256                      |
| Image resolution                  | 92 $\mu\text{m}/\text{pixel}$ | 625 $\mu\text{m}/\text{pixel}$ | 117 $\mu\text{m}/\text{pixel}$ |
| Field of view (mm)                | 30 $\times$ 30                | 40 $\times$ 40                 | 30 $\times$ 30                 |
| Number of averages                | 8                             | 3                              | 2                              |
| Slices                            | 10                            | 1                              | 1                              |
| Slice thickness ( $\mu\text{m}$ ) | 500                           | 40000                          | 1000                           |
| Echo images                       | N.A                           | 2                              | 8                              |
| Echo spacing (ms)                 | N.A                           | 3.569                          | 5.5                            |

|                  |                          |                         |               |
|------------------|--------------------------|-------------------------|---------------|
| Acquisition time | 3 min, 13 sec, 915<br>ms | 2 min, 2 sec, 880<br>ms | 8 min, 32 sec |
|------------------|--------------------------|-------------------------|---------------|

**Table SI.1.** MR acquisition parameters for SPIONs based phantoms. All images and mapping were axially performed.

| Sequence                          | T2 Map<br>MSME                 | B0 Map                         | MGE<br>T2* Map                    | RARE T2                          | FLASH (axial<br>and coronal)  |
|-----------------------------------|--------------------------------|--------------------------------|-----------------------------------|----------------------------------|-------------------------------|
| Purpose                           | T2 relaxation                  | Shimming                       | T2*<br>relaxation                 | T2 imaging                       | T2* imaging                   |
| Echo time (ms)                    | 9                              | 1.59                           | 4.5                               | 36                               | 7                             |
| Repetition time (ms)              | 2000                           | 10                             | 800                               | 2200                             | 330                           |
| Flip angle                        | N.A                            | 15                             | 50                                | N.A                              | 30                            |
| Matrix size (pixels)              | 256 x 256                      | 64 x 64                        | 256 x 256                         | 512 x 512                        | 512 x 512                     |
| Image resolution                  | 117 $\mu\text{m}/\text{pixel}$ | 625 $\mu\text{m}/\text{pixel}$ | 117<br>$\mu\text{m}/\text{pixel}$ | 59<br>$\mu\text{m}/\text{pixel}$ | 59 $\mu\text{m}/\text{pixel}$ |
| Field of view (mm)                | 30 $\times$ 30                 | 40 $\times$ 40                 | 30 $\times$ 30                    | 30 $\times$ 30                   | 30 $\times$ 30                |
| Number of averages                | 1                              | 3                              | 2                                 | 6                                | 6                             |
| Slices                            | 5                              | 1                              | 1                                 | 19                               | 19                            |
| Slice thickness ( $\mu\text{m}$ ) | 1000                           | 40000                          | 1000                              | 500                              | 500                           |
| Echo images                       | 25                             | 2                              | 8                                 | 1                                | N.A                           |
| Echo spacing (ms)                 | 9                              | 3.569                          | 5.5                               | 12                               | N.A                           |

|                  |               |                         |                            |                          |                           |
|------------------|---------------|-------------------------|----------------------------|--------------------------|---------------------------|
| Acquisition time | 8 min, 32 sec | 2 min, 2 sec,<br>880 ms | 5 min, 7<br>sec, 200<br>ms | 14 min, 4<br>sec, 800 ms | 16 min, 53<br>sec, 760 ms |
| Rare factor      | N.A           | N.A                     | N.A                        | 8                        | N.A                       |
| Excitation angle | 90            | N.A                     | N.A                        | 90                       | N.A                       |
| Refocusing angle | 180           | N.A                     | N.A                        | 180                      | N.A                       |

**Table SI.2.** MR acquisition parameters for labelled mMSCs based phantoms.

| <b>Sequence</b>                   | <b>FLASH T2*</b>        | <b>B0 Map</b>            | <b>MGE<br/>T2* Map</b>   |
|-----------------------------------|-------------------------|--------------------------|--------------------------|
| Purpose                           | T2* imaging             | Shimming                 | T2* relaxation           |
| Echo time (ms)                    | 5.5                     | 1.59                     | 4.5                      |
| Repetition time (ms)              | 305                     | 10                       | 1050                     |
| Flip angle                        | 20                      | 15                       | 50                       |
| Matrix size (pixels)              | 386 x 386               | 64 x 64                  | 256 x 256                |
| Image resolution                  | 91 $\mu\text{m}$ /pixel | 703 $\mu\text{m}$ /pixel | 137 $\mu\text{m}$ /pixel |
| Field of view (mm)                | 35 $\times$ 35          | 45 $\times$ 45           | 35 $\times$ 35           |
| Number of averages                | 3                       | 3                        | 2                        |
| Slices                            | 23                      | 1                        | 23                       |
| Slice thickness ( $\mu\text{m}$ ) | 500                     | 45000                    | 500                      |
| Echo images                       | N.A                     | 2                        | 8                        |
| Echo spacing (ms)                 | N.A                     | 2.855                    | 4.5                      |
| Acquisition time                  | 5 min, 53 sec, 190 ms   | 2 min, 2 sec, 880 ms     | 6 min, 43 sec, 200 ms    |

|                    |     |    |     |
|--------------------|-----|----|-----|
| Reconstruction MAP | N.A | 20 | N.A |
| Signal to noise    |     |    |     |

**Table SI.3.** MR acquisition parameters for *in vivo* MRI.
